# Supplementary material for: Demographics, Outcomes, and Risk Factors for Patients with Sarcoma and COVID-19: A CCC19-Registry Based Retrospective Cohort Study
Source: MDPI journal article supplement (doi:10.3390/cancers14174334), 2022-09-05
Supplement: s1 [file s1]

Supplemental Table S1: Sarcoma subtype at diagnosis and classification into sarcoma subgroups.

| <b>Sarcoma Type</b>                                          | <b>All subjects</b><br>N = 281 | <b>STS</b><br>N = 153 | <b>Bone</b><br>N = 48 | <b>GIST</b><br>N = 45 | <b>Other/Indolent</b><br>N = 35 |
|--------------------------------------------------------------|--------------------------------|-----------------------|-----------------------|-----------------------|---------------------------------|
| Angiosarcoma                                                 | 5 (2%)                         | 5 (3%)                | 0 (0%)                | 0 (0%)                | 0 (0%)                          |
| Bone cancer, NOS                                             | 8 (3%)                         | 0 (0%)                | 8 (17%)               | 0 (0%)                | 0 (0%)                          |
| Dedifferentiated liposarcoma                                 | 14 (5%)                        | 14 (9%)               | 0 (0%)                | 0 (0%)                | 0 (0%)                          |
| Ewing sarcoma                                                | 14 (5%)                        | 0 (0%)                | 14 (29%)              | 0 (0%)                | 0 (0%)                          |
| GIST                                                         | 45 (16%)                       | 0 (0%)                | 0 (0%)                | 45 (100%)             | 0 (0%)                          |
| Kaposi sarcoma                                               | 18 (6%)                        | 0 (0%)                | 0 (0%)                | 0 (0%)                | 18 (51%)                        |
| Malignant peripheral nerve sheath tumor (MPNST)              | 5 (2%)                         | 5 (3%)                | 0 (0%)                | 0 (0%)                | 0 (0%)                          |
| Multiple                                                     | 5 (2%)                         | 5 (3%)                | 0 (0%)                | 0 (0%)                | 0 (0%)                          |
| Myxoid/round cell liposarcoma                                | 7 (2%)                         | 7 (5%)                | 0 (0%)                | 0 (0%)                | 0 (0%)                          |
| Non-uterine Leiomyosarcoma                                   | 16 (6%)                        | 16 (10%)              | 0 (0%)                | 0 (0%)                | 0 (0%)                          |
| Osteosarcoma                                                 | 26 (9%)                        | 0 (0%)                | 26 (54%)              | 0 (0%)                | 0 (0%)                          |
| Rhabdomyosarcoma                                             | 3 (1%)                         | 3 (2%)                | 0 (0%)                | 0 (0%)                | 0 (0%)                          |
| Soft tissue sarcoma NOS                                      | 12 (4%)                        | 12 (8%)               | 0 (0%)                | 0 (0%)                | 0 (0%)                          |
| Spindle cell/soft tissue sarcoma NOS                         | 16 (6%)                        | 16 (10%)              | 0 (0%)                | 0 (0%)                | 0 (0%)                          |
| STS or Vascular - Other                                      | 27 (10%)                       | 27 (18%)              | 0 (0%)                | 0 (0%)                | 0 (0%)                          |
| STS or Vascular - Unknown                                    | 1 (0%)                         | 1 (1%)                | 0 (0%)                | 0 (0%)                | 0 (0%)                          |
| Synovial sarcoma                                             | 11 (4%)                        | 11 (7%)               | 0 (0%)                | 0 (0%)                | 0 (0%)                          |
| Undifferentiated pleomorphic sarcoma (UPS)/ Myxofibrosarcoma | 25 (9%)                        | 25 (16%)              | 0 (0%)                | 0 (0%)                | 0 (0%)                          |
| Uterine leiomyosarcoma                                       | 6 (2%)                         | 6 (4%)                | 0 (0%)                | 0 (0%)                | 0 (0%)                          |
| Well differentiated liposarcoma                              | 16 (6%)                        | 0 (0%)                | 0 (0%)                | 0 (0%)                | 16 (46%)                        |
| Missing/Unknown                                              | 1 (0%)                         | 0 (0%)                | 0 (0%)                | 0 (0%)                | 1 (3%)                          |

Supplemental Table S2: Laboratory results among hospitalized patients.

| Characteristics           | All hospitalized subjects<br>N = 122 | STS<br>N = 66 | Bone<br>N = 21 | GIST<br>N = 19 | Other/Indolent<br>N = 16 |
|---------------------------|--------------------------------------|---------------|----------------|----------------|--------------------------|
| Absolute lymphocyte count |                                      |               |                |                |                          |
| Low                       | 50 (41%)                             | 29 (44%)      | 8 (38%)        | 7 (37%)        | 6 (38%)                  |
| Normal                    | 39 (32%)                             | 18 (27%)      | 9 (43%)        | 10 (53%)       | 2 (12%)                  |
| High                      | 0 (0%)                               | 0 (0%)        | 0 (0%)         | 0 (0%)         | 0 (0%)                   |
| Missing/Unknown           | 33 (27%)                             | 19 (29%)      | 4 (19%)        | 2 (11%)        | 8 (50%)                  |
| Absolute neutrophil count |                                      |               |                |                |                          |
| Low                       | 6 (5%)                               | 4 (6%)        | 1 (5%)         | 1 (5%)         | 0 (0%)                   |
| Normal                    | 63 (52%)                             | 34 (52%)      | 10 (48%)       | 11 (58%)       | 8 (50%)                  |
| High                      | 21 (17%)                             | 10 (15%)      | 6 (29%)        | 5 (26%)        | 0 (0%)                   |
| Missing/Unknown           | 32 (26%)                             | 18 (27%)      | 4 (19%)        | 2 (11%)        | 8 (50%)                  |
| White Blood Cell Count    |                                      |               |                |                |                          |
| Low                       | 27 (22%)                             | 13 (20%)      | 4 (19%)        | 5 (26%)        | 5 (31%)                  |
| Normal                    | 57 (47%)                             | 33 (50%)      | 11 (52%)       | 8 (42%)        | 5 (31%)                  |
| High                      | 16 (13%)                             | 9 (14%)       | 3 (14%)        | 4 (21%)        | 0 (0%)                   |
| Missing/Unknown           | 22 (18%)                             | 11 (17%)      | 3 (14%)        | 2 (11%)        | 6 (38%)                  |
| Creatinine                |                                      |               |                |                |                          |
| Normal                    | 78 (64%)                             | 46 (70%)      | 13 (62%)       | 12 (63%)       | 7 (44%)                  |
| Abnormal                  | 20 (16%)                             | 8 (12%)       | 4 (19%)        | 5 (26%)        | 3 (19%)                  |
| Missing/Unknown           | 24 (20%)                             | 12 (18%)      | 4 (19%)        | 2 (11%)        | 6 (38%)                  |
| LDH                       |                                      |               |                |                |                          |
| Normal                    | 20 (16%)                             | 9 (14%)       | 3 (14%)        | 5 (26%)        | 3 (19%)                  |
| Abnormal                  | 33 (27%)                             | 15 (23%)      | 7 (33%)        | 6 (32%)        | 5 (31%)                  |
| Missing/Unknown           | 69 (57%)                             | 42 (64%)      | 11 (52%)       | 8 (42%)        | 8 (50%)                  |
| D-Dimer                   |                                      |               |                |                |                          |
| Normal                    | 10 (8%)                              | 5 (8%)        | 3 (14%)        | 1 (5%)         | 1 (6%)                   |
| Abnormal                  | 47 (39%)                             | 27 (41%)      | 5 (24%)        | 9 (47%)        | 6 (38%)                  |
| Missing/Unknown           | 65 (53%)                             | 34 (52%)      | 13 (62%)       | 9 (47%)        | 9 (56%)                  |
